# Supplementary material for: A donor–acceptor type organic dye connected with a quinoidal thiophene for dye-sensitized solar cells
Source: Royal Society of Chemistry journal article supplement (doi:10.1039/c2cp43598e), 2013-01-01
Supplement: c2cp43598e.pdf [file c2cp43598e.pdf]

## Electronic Supplementary Information

### Donor-acceptor type organic dye connected with quinoidal thiophene for dye-sensitized solar cell

Makoto Komatsu, Jotaro Nakazaki,\* Satoshi Uchida, Takaya Kubo and Hiroshi Segawa\*

*Research Center for Advanced Science and Technology, The University of Tokyo,  
4-6-1, Komaba, Meguro-ku, Tokyo, 153-8904, Japan.*

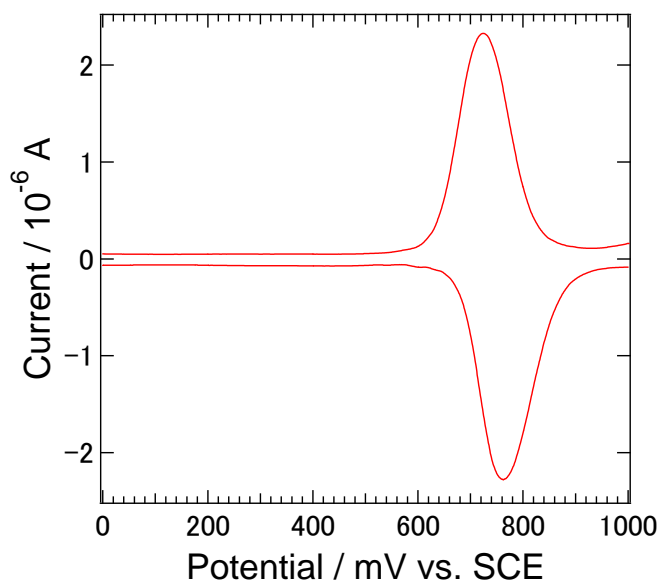

**Fig.S1** Differential pulse voltammogram of quinoidal thiophene dye in acetonitrile.

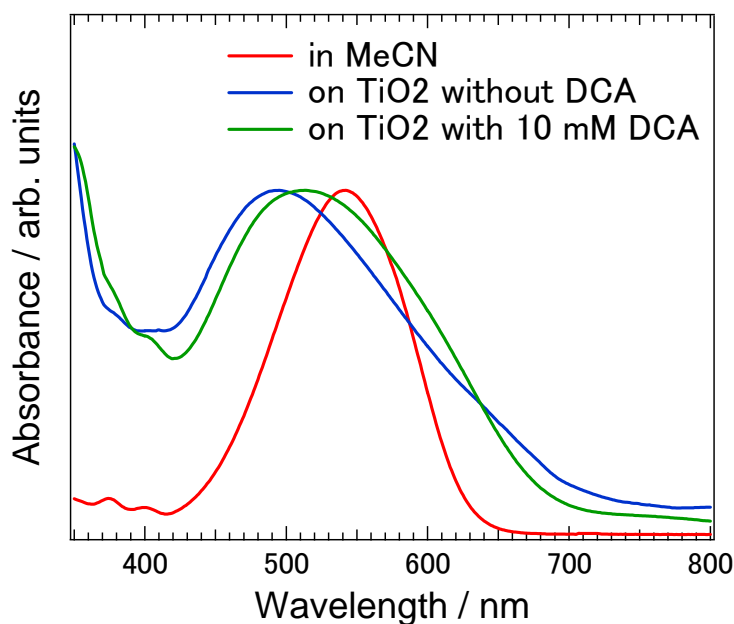

**Fig.S2** Absorption spectra of quinoidal thiophene dye in acetonitrile (red line) or on TiO<sub>2</sub> (blue line), and that with 10 mM deoxycholic acid on TiO<sub>2</sub> (green line).
